# Supplementary material for: Enantioselective synthesis of highly oxygenated acyclic quaternary center-containing building blocks via palladium-catalyzed decarboxylative allylic alkylation of cyclic siloxyketones
Source: Chem Sci. 2020 Sep 15;11(40):11068–71. doi: 10.1039/d0sc04383d (PMC8162308; doi:10.1039/d0sc04383d)
Supplement: SC-011-D0SC04383D-s001 [file SC-011-D0SC04383D-s001.xlsx]

## Sheet: R_GREL_AND_ROTS_DUNNING
R_CONFS_26	0	38.08	0	0	0	1	14.9548	0.0668682	1	2.54634	-1.14274
R_CONFS_39	0.177	88.37	740.568	-89.0693	-0.29874	0.741752		0.0495997		4.38312
R_CONFS_64	0.206	56.71	861.904	-103.663	-0.347686	0.706321		0.0472304		2.67844
R_CONFS_88	0.239	-40.01	999.976	-120.269	-0.403383	0.668056		0.0446717		-1.78732
R_CONFS_816	0.373	-95.45	1560.63	-187.7	-0.629548	0.532832		0.0356296		-3.40084
R_CONFS_144	0.466	-38.78	1949.74	-234.499	-0.786513	0.45543		0.0304538		-1.181
R_CONFS_90	0.473	-65.14	1979.03	-238.021	-0.798328	0.450081		0.0300961		-1.96046
R_CONFS_128	0.478	-112.72	1999.95	-240.538	-0.806767	0.446299		0.0298432		-3.36393
R_CONFS_129	0.545	89.9	2280.28	-274.253	-0.919849	0.398579		0.0266523		2.39604
R_CONFS_55	0.583	23.48	2439.27	-293.375	-0.983986	0.373818		0.0249966		0.586919
R_CONFS_131	0.626	-4.87	2619.18	-315.014	-1.05656	0.347649		0.0232467		-0.113211
R_CONFS_51	0.627	10.74	2623.37	-315.517	-1.05825	0.347063		0.0232075		0.249248
R_CONFS_107	0.633	83.01	2648.47	-318.536	-1.06838	0.343566		0.0229737		1.90704
R_CONFS_57	0.639	-18.51	2673.58	-321.555	-1.0785	0.340105		0.0227422		-0.420958
R_CONFS_8	0.693	-15.58	2899.51	-348.729	-1.16964	0.310478		0.0207611		-0.323458
R_CONFS_13	0.695	39.03	2907.88	-349.736	-1.17302	0.309431		0.0206911		0.807575
R_CONFS_166	0.704	123.86	2945.54	-354.265	-1.18821	0.304767		0.0203792		2.52417
R_CONFS_122	0.754	-68.06	3154.74	-379.425	-1.2726	0.280103		0.01873		-1.27476
R_CONFS_533	0.767	9.21	3209.13	-385.967	-1.29454	0.274024		0.0183235		0.168759
R_CONFS_771	0.777	109.81	3250.97	-390.999	-1.31142	0.269438		0.0180168		1.97843
R_CONFS_802	0.781	-30.85	3267.7	-393.012	-1.31817	0.267625		0.0178956		-0.552079
R_CONFS_201	0.786	-26.85	3288.62	-395.528	-1.32661	0.265376		0.0177452		-0.476459
R_CONFS_11	0.806	63.39	3372.3	-405.593	-1.36036	0.256567		0.0171562		1.08753
R_CONFS_27	0.825	10.93	3451.8	-415.154	-1.39243	0.24847		0.0166148		0.181599
R_CONFS_125	0.84	58.58	3514.56	-422.702	-1.41775	0.242259		0.0161994		0.948961
R_CONFS_728	0.867	-38.43	3627.53	-436.289	-1.46332	0.231467		0.0154778		-0.59481
R_CONFS_2	0.889	-119.19	3719.58	-447.36	-1.50045	0.223029		0.0149136		-1.77755
R_CONFS_117	0.9	-52.11	3765.6	-452.895	-1.51902	0.218927		0.0146393		-0.762852
R_CONFS_772	0.95	-103.73	3974.8	-478.056	-1.60341	0.20121		0.0134545		-1.39564
R_CONFS_76	0.962	38.38	4025.01	-484.094	-1.62366	0.197176		0.0131848		0.506032
R_CONFS_140	1.028	-17.76	4301.15	-517.307	-1.73506	0.17639		0.0117949		-0.209478
R_CONFS_54	1.037	41.1	4338.81	-521.836	-1.75025	0.173731		0.0116171		0.477463
R_CONFS_66	1.057	-34.16	4422.49	-531.9	-1.784	0.167965		0.0112315		-0.383668
R_CONFS_289	1.059	124.06	4430.86	-532.906	-1.78738	0.167399		0.0111937		1.38868
R_CONFS_732	1.103	-6.72	4614.95	-555.048	-1.86164	0.155418		0.0103925		-0.0698376
R_CONFS_196	1.13	7.44	4727.92	-568.635	-1.90721	0.148494		0.00992953		0.0738757
R_CONFS_154	1.167	-67.51	4882.73	-587.254	-1.96966	0.139504		0.00932841		-0.629761
R_CONFS_831	1.172	106.58	4903.65	-589.77	-1.9781	0.138332		0.00925002		0.985867
R_CONFS_123	1.196	-168.26	5004.06	-601.847	-2.01861	0.132841		0.00888282		-1.49462
R_CONFS_228	1.283	-97.09	5368.07	-645.627	-2.16544	0.114699		0.00766972		-0.744653
R_CONFS_675	1.313	-103.83	5493.59	-660.723	-2.21608	0.109036		0.00729104		-0.757029
R_CONFS_71	1.33	-7.88	5564.72	-669.278	-2.24477	0.105952		0.00708482		-0.0558284
R_CONFS_85	1.371	20.91	5736.26	-689.91	-2.31397	0.098868		0.00661113		0.138239
R_CONFS_50	1.401	7.87	5861.78	-705.007	-2.3646	0.0939866		0.00628471		0.0494607
R_CONFS_104	1.438	-75.46	6016.59	-723.626	-2.42705	0.0882967		0.00590425		-0.445534
R_CONFS_15	1.468	-27.71	6142.11	-738.722	-2.47769	0.0839372		0.00561273		-0.155529
R_CONFS_14	1.544	26.17	6460.1	-776.967	-2.60596	0.0738323		0.00493704		0.129202
R_CONFS_3	1.564	-41.29	6543.78	-787.031	-2.63971	0.0713816		0.00477316		-0.197084
R_CONFS_767	1.588	-36.36	6644.19	-799.108	-2.68022	0.068548		0.00458368		-0.166663
R_CONFS_24	1.599	80.62	6690.22	-804.643	-2.69879	0.0672871		0.00449937		0.362739
R_CONFS_739	1.662	35.79	6953.81	-836.346	-2.80512	0.0604996		0.0040455		0.144788
R_CONFS_32	1.697	43.04	7100.25	-853.959	-2.86419	0.0570292		0.00381344		0.164131
R_CONFS_260	1.729	-96.34	7234.14	-870.062	-2.9182	0.0540308		0.00361294		-0.348071
R_CONFS_31	1.729	-29.31	7234.14	-870.062	-2.9182	0.0540308		0.00361294		-0.105895
R_CONFS_210	1.757	-88.53	7351.29	-884.152	-2.96546	0.0515368		0.00344617		-0.30509
R_CONFS_730	1.768	-44.08	7397.31	-889.687	-2.98403	0.0505888		0.00338278		-0.149113
R_CONFS_239	1.817	-110.19	7602.33	-914.345	-3.06673	0.0465733		0.00311428		-0.343162
R_CONFS_173	1.838	36.79	7690.19	-924.912	-3.10217	0.0449515		0.00300583		0.110584
R_CONFS_160	1.841	-157.96	7702.74	-926.422	-3.10723	0.0447245		0.00299065		-0.472403
R_CONFS_61	1.879	-95.44	7861.74	-945.544	-3.17137	0.0419461		0.00280486		-0.267696
R_CONFS_761	1.933	8.75	8087.67	-972.718	-3.26251	0.0382921		0.00256053		0.0224046
R_CONFS_35	1.953	-10.86	8171.35	-982.782	-3.29627	0.0370211		0.00247553		-0.0268843
R_CONFS_302	1.955	-102.2	8179.72	-983.789	-3.29964	0.0368963		0.00246719		-0.252147
R_CONFS_356	2.034	-102.09	8510.26	-1023.54	-3.43298	0.0322906		0.00215922		-0.220434
R_CONFS_105	2.045	51.11	8556.28	-1029.08	-3.45154	0.0316966		0.0021195		0.108328
R_CONFS_53	2.063	-64.34	8631.59	-1038.14	-3.48193	0.0307482		0.00205607		-0.132288
R_CONFS_168	2.093	95.42	8757.11	-1053.23	-3.53256	0.02923		0.00195456		0.186504
R_CONFS_327	2.105	-40.04	8807.32	-1059.27	-3.55281	0.028644		0.00191537		-0.0766914
R_CONFS_791	2.13	-59.68	8911.92	-1071.85	-3.59501	0.0274605		0.00183623		-0.109586
R_CONFS_10	2.137	42.53	8941.21	-1075.37	-3.60682	0.027138		0.00181467		0.0771778
R_CONFS_101	2.14	-182.4	8953.76	-1076.88	-3.61189	0.0270009		0.0018055		-0.329323
R_CONFS_754	2.198	21.19	9196.43	-1106.07	-3.70978	0.024483		0.00163713		0.0346908
R_CONFS_236	2.209	-18.75	9242.46	-1111.61	-3.72834	0.0240326		0.00160702		-0.0301316
R_CONFS_192	2.211	-40.92	9250.82	-1112.61	-3.73172	0.0239516		0.0016016		-0.0655376
R_CONFS_242	2.227	10.83	9317.77	-1120.66	-3.75872	0.0233135		0.00155893		0.0168832
R_CONFS_58	2.23	-80.74	9330.32	-1122.17	-3.76379	0.0231957		0.00155106		-0.125232
R_CONFS_175	2.272	-71.35	9506.05	-1143.31	-3.83467	0.0216084		0.00144491		-0.103095
R_CONFS_169	2.285	75.12	9560.44	-1149.85	-3.85662	0.0211394		0.00141355		0.106186
R_CONFS_187	2.307	-73.94	9652.49	-1160.92	-3.89375	0.0203689		0.00136203		-0.100709
R_CONFS_165	2.314	-23.24	9681.78	-1164.44	-3.90556	0.0201296		0.00134603		-0.0312818
R_CONFS_202	2.356	-71.01	9857.5	-1185.58	-3.97645	0.0187521		0.00125392		-0.0890408
R_CONFS_293	2.368	-99.3	9907.71	-1191.62	-3.9967	0.0183761		0.00122878		-0.122018
R_CONFS_323	2.385	-33.18	9978.84	-1200.17	-4.0254	0.0178564		0.00119402		-0.0396177
R_CONFS_216	2.392	-95.28	10008.1	-1203.69	-4.03721	0.0176466		0.00118		-0.11243
R_CONFS_157	2.567	-105.34	10740.3	-1291.76	-4.33257	0.0131337		0.000878226		-0.0925124
R_CONFS_176	2.588	80.48	10828.2	-1302.32	-4.36802	0.0126763		0.000847644		0.0682184
R_CONFS_203	2.643	-15.23	11058.3	-1330	-4.46085	0.0115526		0.0007725		-0.0117652
R_CONFS_217	2.699	-80.74	11292.6	-1358.18	-4.55536	0.0105107		0.00070283		-0.0567465
R_CONFS_18	2.705	-123.84	11317.7	-1361.2	-4.56549	0.0104048		0.000695749		-0.0861615
R_CONFS_163	2.723	-57.95	11393	-1370.26	-4.59587	0.0100934		0.000674929		-0.0391122
R_CONFS_100	2.728	29.5	11414	-1372.78	-4.60431	0.0100086		0.000669258		0.0197431
R_CONFS_127	2.797	-31.61	11702.6	-1407.5	-4.72077	0.00890833		0.000595684		-0.0188296
R_CONFS_38	2.843	-68.61	11895.1	-1430.64	-4.79841	0.00824287		0.000551186		-0.0378169
R_CONFS_167	2.867	45.59	11995.5	-1442.72	-4.83891	0.00791565		0.000529305		0.024131
R_CONFS_135	2.885	19.61	12070.8	-1451.78	-4.86929	0.00767878		0.000513467		0.0100691
R_CONFS_330	2.905	-4.59	12154.5	-1461.84	-4.90305	0.0074239		0.000496423		-0.00227858
R_CONFS_121	2.93	-0.8	12259.1	-1474.42	-4.94525	0.00711717		0.000475913		-0.00038073
R_CONFS_178	2.993	120.41	12522.7	-1506.13	-5.05158	0.00639924		0.000427906		0.0515241
R_CONFS_198	3.031	51.78	12681.7	-1525.25	-5.11571	0.0060017		0.000401323		0.0207805
R_CONFS_221	3.041	76.39	12723.5	-1530.28	-5.13259	0.00590125		0.000394606		0.030144
R_CONFS_827	3.069	7.64	12840.7	-1544.37	-5.17985	0.00562886		0.000376392		0.00287563
R_CONFS_235	3.185	83.91	13326	-1602.75	-5.37563	0.00462799		0.000309465		0.0259672
R_CONFS_136	3.249	-101.19	13593.8	-1634.95	-5.48365	0.00415413		0.000277779		-0.0281085
R_CONFS_159	3.254	-120.83	13614.7	-1637.47	-5.49209	0.00411922		0.000275445		-0.033282
R_CONFS_161	3.268	105.53	13673.3	-1644.51	-5.51572	0.00402303		0.000269013		0.0283889
R_CONFS_138	3.308	138.84	13840.7	-1664.64	-5.58323	0.00376039		0.000251451		0.0349114
R_CONFS_119	3.39	76.25	14183.8	-1705.9	-5.72163	0.00327436		0.000218951		0.016695
R_CONFS_212	3.391	120.43	14187.9	-1706.41	-5.72332	0.00326884		0.000218582		0.0263238
R_CONFS_70	3.42	142.31	14309.3	-1721	-5.77227	0.0031127		0.000208141		0.0296205
R_CONFS_111	3.428	-30.41	14342.8	-1725.03	-5.78577	0.00307095		0.000205349		-0.00624466
R_CONFS_316	3.436	-60.87	14376.2	-1729.05	-5.79927	0.00302976		0.000202595		-0.012332
R_CONFS_82	3.443	40.95	14405.5	-1732.57	-5.81108	0.00299418		0.000200215		0.00819882
R_CONFS_224	3.496	-19.59	14627.3	-1759.25	-5.90054	0.00273797		0.000183083		-0.0035866
R_CONFS_152	3.582	103.83	14987.1	-1802.52	-6.04569	0.00236805		0.000158347		0.0164412
R_CONFS_146	3.677	-103.6	15384.6	-1850.33	-6.20603	0.00201723		0.000134889		-0.0139745
R_CONFS_434	3.73	53.25	15606.3	-1877	-6.29548	0.00184462		0.000123346		0.00656819
R_CONFS_399	3.742	43.55	15656.5	-1883.04	-6.31574	0.00180763		0.000120873		0.00526403
conf_name	dGrel	SROT						normalized_pop		weighted_SROT

## Sheet: R_EREL_AND_ROTS_DUNNING
R_CONFS_26	0	38.08	0	0	0	1	21.3935	0.0467433	1	1.77998	-2.48822
R_CONFS_88	0.022	-40.01	92.048	-11.0708	-0.0371315	0.963549		0.0450395		-1.80203
R_CONFS_27	0.112	10.93	468.608	-56.3603	-0.189033	0.827759		0.0386922		0.422905
R_CONFS_816	0.134	-95.45	560.656	-67.431	-0.226165	0.797587		0.0372818		-3.55855
R_CONFS_39	0.151	88.37	631.784	-75.9857	-0.254857	0.775027		0.0362273		3.20141
R_CONFS_125	0.19	58.58	794.96	-95.6112	-0.320681	0.725654		0.0339195		1.987
R_CONFS_13	0.305	39.03	1276.12	-153.481	-0.514778	0.597633		0.0279353		1.09032
R_CONFS_90	0.327	-65.14	1368.17	-164.552	-0.55191	0.575849		0.0269171		-1.75338
R_CONFS_129	0.35	89.9	1464.4	-176.126	-0.590729	0.553923		0.0258922		2.32771
R_CONFS_11	0.351	63.39	1468.58	-176.629	-0.592417	0.552989		0.0258485		1.63854
R_CONFS_2	0.356	-119.19	1489.5	-179.145	-0.600856	0.548342		0.0256313		-3.055
R_CONFS_128	0.372	-112.72	1556.45	-187.197	-0.62786	0.533733		0.0249484		-2.81218
R_CONFS_728	0.39	-38.43	1631.76	-196.254	-0.658241	0.517761		0.0242019		-0.930078
R_CONFS_122	0.392	-68.06	1640.13	-197.261	-0.661616	0.516017		0.0241203		-1.64163
R_CONFS_289	0.392	124.06	1640.13	-197.261	-0.661616	0.516017		0.0241203		2.99236
R_CONFS_107	0.442	83.01	1849.33	-222.422	-0.746006	0.474257		0.0221683		1.84019
R_CONFS_831	0.46	106.58	1924.64	-231.48	-0.776387	0.460065		0.021505		2.292
R_CONFS_772	0.466	-103.73	1949.74	-234.499	-0.786513	0.45543		0.0212883		-2.20823
R_CONFS_771	0.503	109.81	2104.55	-253.118	-0.848962	0.427859		0.0199995		2.19615
R_CONFS_51	0.528	10.74	2209.15	-265.698	-0.891157	0.410181		0.0191732		0.20592
R_CONFS_131	0.557	-4.87	2330.49	-280.292	-0.940103	0.390588		0.0182573		-0.0889133
R_CONFS_154	0.574	-67.51	2401.62	-288.846	-0.968795	0.37954		0.0177409		-1.19769
R_CONFS_533	0.634	9.21	2652.66	-319.039	-1.07006	0.342987		0.0160323		0.147658
R_CONFS_732	0.636	-6.72	2661.02	-320.046	-1.07344	0.341831		0.0159783		-0.107374
R_CONFS_55	0.642	23.48	2686.13	-323.065	-1.08357	0.338387		0.0158173		0.37139
R_CONFS_144	0.704	-38.78	2945.54	-354.265	-1.18821	0.304767		0.0142458		-0.552452
R_CONFS_54	0.739	41.1	3091.98	-371.877	-1.24728	0.287285		0.0134286		0.551916
R_CONFS_196	0.741	7.44	3100.34	-372.884	-1.25066	0.286316		0.0133834		0.0995723
R_CONFS_71	0.775	-7.88	3242.6	-389.993	-1.30804	0.270349		0.012637		-0.0995794
R_CONFS_166	0.783	123.86	3276.07	-394.019	-1.32155	0.266723		0.0124675		1.54422
R_CONFS_76	0.79	38.38	3305.36	-397.541	-1.33336	0.26359		0.0123211		0.472883
R_CONFS_802	0.802	-30.85	3355.57	-403.58	-1.35361	0.258305		0.012074		-0.372484
R_CONFS_57	0.823	-18.51	3443.43	-414.147	-1.38906	0.24931		0.0116536		-0.215708
R_CONFS_64	0.84	56.71	3514.56	-422.702	-1.41775	0.242259		0.011324		0.642182
R_CONFS_3	0.882	-41.29	3690.29	-443.837	-1.48864	0.22568		0.010549		-0.435569
R_CONFS_675	0.909	-103.83	3803.26	-457.424	-1.53421	0.215627		0.0100791		-1.04651
R_CONFS_50	0.99	7.87	4142.16	-498.184	-1.67092	0.188074		0.0087912		0.0691868
R_CONFS_104	0.993	-75.46	4154.71	-499.694	-1.67598	0.187124		0.0087468		-0.660034
R_CONFS_767	1.048	-36.36	4384.83	-527.371	-1.76881	0.170536		0.00797139		-0.28984
R_CONFS_117	1.123	-52.11	4698.63	-565.112	-1.8954	0.150259		0.00702359		-0.365999
R_CONFS_123	1.154	-168.26	4828.34	-580.712	-1.94772	0.142599		0.00666555		-1.12155
R_CONFS_239	1.157	-110.19	4840.89	-582.222	-1.95278	0.141879		0.00663189		-0.730768
R_CONFS_140	1.174	-17.76	4912.02	-590.776	-1.98147	0.137866		0.0064443		-0.114451
R_CONFS_730	1.176	-44.08	4920.38	-591.783	-1.98485	0.137401		0.00642259		-0.283108
R_CONFS_85	1.18	20.91	4937.12	-593.796	-1.9916	0.136477		0.00637937		0.133393
R_CONFS_35	1.191	-10.86	4983.14	-599.331	-2.01017	0.133966		0.00626203		-0.0680056
R_CONFS_31	1.224	-29.31	5121.22	-615.937	-2.06586	0.126709		0.00592279		-0.173597
R_CONFS_66	1.258	-34.16	5263.47	-633.047	-2.12325	0.119642		0.00559247		-0.191039
R_CONFS_173	1.282	36.79	5363.89	-645.124	-2.16376	0.114893		0.00537047		0.197579
R_CONFS_24	1.289	80.62	5393.18	-648.646	-2.17557	0.113543		0.00530739		0.427882
R_CONFS_8	1.338	-15.58	5598.19	-673.304	-2.25827	0.104531		0.00488612		-0.0761257
R_CONFS_15	1.358	-27.71	5681.87	-683.368	-2.29203	0.101061		0.00472393		-0.1309
R_CONFS_14	1.381	26.17	5778.1	-694.942	-2.33085	0.0972133		0.00454407		0.118918
R_CONFS_754	1.396	21.19	5840.86	-702.49	-2.35616	0.0947831		0.00443047		0.0938817
R_CONFS_101	1.414	-182.4	5916.18	-711.548	-2.38654	0.0919468		0.0042979		-0.783936
R_CONFS_32	1.419	43.04	5937.1	-714.064	-2.39498	0.0911741		0.00426178		0.183427
R_CONFS_201	1.443	-26.85	6037.51	-726.142	-2.43549	0.0875547		0.0040926		-0.109886
R_CONFS_160	1.451	-157.96	6070.98	-730.167	-2.44899	0.0863805		0.00403771		-0.637796
R_CONFS_169	1.488	75.12	6225.79	-748.786	-2.51144	0.0811511		0.00379327		0.28495
R_CONFS_165	1.499	-23.24	6271.82	-754.322	-2.53001	0.0796584		0.00372349		-0.086534
R_CONFS_210	1.539	-88.53	6439.18	-774.45	-2.59752	0.074458		0.00348041		-0.308121
R_CONFS_761	1.571	8.75	6573.06	-790.553	-2.65153	0.0705433		0.00329742		0.0288525
R_CONFS_228	1.575	-97.09	6589.8	-792.566	-2.65828	0.0700686		0.00327524		-0.317993
R_CONFS_192	1.62	-40.92	6778.08	-815.211	-2.73423	0.0649439		0.00303569		-0.124221
R_CONFS_327	1.634	-40.04	6836.66	-822.256	-2.75786	0.0634273		0.0029648		-0.118711
R_CONFS_302	1.643	-102.2	6874.31	-826.785	-2.77305	0.0624712		0.00292011		-0.298435
R_CONFS_187	1.661	-73.94	6949.62	-835.843	-2.80343	0.0606018		0.00283273		-0.209452
R_CONFS_58	1.668	-80.74	6978.91	-839.365	-2.81525	0.05989		0.00279946		-0.226028
R_CONFS_791	1.702	-59.68	7121.17	-856.475	-2.87263	0.05655		0.00264333		-0.157754
R_CONFS_175	1.71	-71.35	7154.64	-860.5	-2.88613	0.0557916		0.00260788		-0.186072
R_CONFS_168	1.728	95.42	7229.95	-869.558	-2.91651	0.0541221		0.00252984		0.241398
R_CONFS_10	1.756	42.53	7347.1	-883.648	-2.96377	0.0516239		0.00241307		0.102628
R_CONFS_217	1.841	-80.74	7702.74	-926.422	-3.10723	0.0447245		0.00209057		-0.168793
R_CONFS_356	1.846	-102.09	7723.66	-928.938	-3.11567	0.0443486		0.002073		-0.211633
R_CONFS_53	1.863	-64.34	7794.79	-937.493	-3.14437	0.0430942		0.00201437		-0.129604
R_CONFS_105	1.866	51.11	7807.34	-939.002	-3.14943	0.0428766		0.00200419		0.102434
R_CONFS_202	1.89	-71.01	7907.76	-951.079	-3.18994	0.0411745		0.00192463		-0.136668
R_CONFS_176	2.028	80.48	8485.15	-1020.52	-3.42285	0.0326193		0.00152473		0.12271
R_CONFS_236	2.029	-18.75	8489.34	-1021.03	-3.42454	0.0325643		0.00152216		-0.0285405
R_CONFS_163	2.088	-57.95	8736.19	-1050.72	-3.52412	0.0294777		0.00137789		-0.0798485
R_CONFS_18	2.116	-123.84	8853.34	-1064.81	-3.57138	0.0281171		0.00131428		-0.162761
R_CONFS_739	2.117	35.79	8857.53	-1065.31	-3.57307	0.0280697		0.00131207		0.0469589
R_CONFS_216	2.13	-95.28	8911.92	-1071.85	-3.59501	0.0274605		0.00128359		-0.122301
R_CONFS_260	2.147	-96.34	8983.05	-1080.41	-3.6237	0.0266838		0.00124729		-0.120164
R_CONFS_100	2.193	29.5	9175.51	-1103.55	-3.70134	0.0246905		0.00115411		0.0340463
R_CONFS_221	2.253	76.39	9426.55	-1133.75	-3.80261	0.0223125		0.00104296		0.0796718
R_CONFS_242	2.267	10.83	9485.13	-1140.79	-3.82624	0.0217915		0.00101861		0.0110315
R_CONFS_293	2.301	-99.3	9627.38	-1157.9	-3.88362	0.0205762		0.000961798		-0.0955066
R_CONFS_121	2.348	-0.8	9824.03	-1181.55	-3.96295	0.019007		0.00088845		-0.00071076
R_CONFS_212	2.363	120.43	9886.79	-1189.1	-3.98826	0.0185319		0.000866239		0.104321
R_CONFS_161	2.369	105.53	9911.9	-1192.12	-3.99839	0.0183451		0.000857512		0.0904932
R_CONFS_70	2.372	142.31	9924.45	-1193.63	-4.00345	0.0182525		0.000853181		0.121416
R_CONFS_138	2.477	138.84	10363.8	-1246.47	-4.18067	0.0152882		0.000714621		0.099218
R_CONFS_203	2.479	-15.23	10372.1	-1247.47	-4.18405	0.0152367		0.000712213		-0.010847
R_CONFS_82	2.502	40.95	10468.4	-1259.05	-4.22287	0.0146565		0.000685095		0.0280546
R_CONFS_38	2.518	-68.61	10535.3	-1267.1	-4.24987	0.014266		0.000666842		-0.045752
R_CONFS_136	2.559	-101.19	10706.9	-1287.73	-4.31907	0.0133122		0.000622257		-0.0629662
R_CONFS_235	2.562	83.91	10719.4	-1289.24	-4.32414	0.013245		0.000619114		0.0519499
R_CONFS_323	2.616	-33.18	10945.3	-1316.41	-4.41528	0.0120912		0.000565183		-0.0187528
R_CONFS_330	2.641	-4.59	11049.9	-1329	-4.45747	0.0115916		0.000541831		-0.002487
R_CONFS_198	2.654	51.78	11104.3	-1335.54	-4.47941	0.0113401		0.000530072		0.0274471
R_CONFS_827	2.668	7.64	11162.9	-1342.58	-4.50304	0.0110753		0.000517693		0.00395518
R_CONFS_61	2.681	-95.44	11217.3	-1349.12	-4.52498	0.0108349		0.000506458		-0.0483364
R_CONFS_127	2.685	-31.61	11234	-1351.14	-4.53173	0.010762		0.000503051		-0.0159014
R_CONFS_159	2.719	-120.83	11376.3	-1368.25	-4.58912	0.0101618		0.000474996		-0.0573937
R_CONFS_119	2.749	76.25	11501.8	-1383.34	-4.63975	0.00966008		0.000451544		0.0344302
R_CONFS_152	2.778	103.83	11623.2	-1397.94	-4.6887	0.00919864		0.000429974		0.0446442
R_CONFS_111	2.838	-30.41	11874.2	-1428.13	-4.78997	0.00831273		0.000388564		-0.0118162
R_CONFS_135	2.852	19.61	11932.8	-1435.17	-4.8136	0.0081186		0.00037949		0.0074418
R_CONFS_157	2.895	-105.34	12112.7	-1456.81	-4.88617	0.00755027		0.000352924		-0.037177
R_CONFS_434	2.906	53.25	12158.7	-1462.35	-4.90474	0.00741138		0.000346432		0.0184475
R_CONFS_178	2.914	120.41	12192.2	-1466.37	-4.91824	0.00731199		0.000341786		0.0411545
R_CONFS_399	2.947	43.55	12330.2	-1482.98	-4.97394	0.00691586		0.00032327		0.0140784
R_CONFS_146	2.959	-103.6	12380.5	-1489.02	-4.99419	0.0067772		0.000316789		-0.0328193
R_CONFS_167	2.972	45.59	12434.8	-1495.56	-5.01613	0.00663012		0.000309913		0.014129
R_CONFS_224	2.985	-19.59	12489.2	-1502.1	-5.03807	0.00648623		0.000303188		-0.00593944
R_CONFS_316	2.992	-60.87	12518.5	-1505.62	-5.04989	0.00641005		0.000299627		-0.0182383
conf_name	dGrel	SROT						normalized_pop		weighted_SROT

## Sheet: R_EREL_AND_ROTS_POPLE
R_CONFS_88	0	-40.01	0	0	0	1	20.7442	0.0482061	1	-1.92873	-9.55899
R_CONFS_26	0.132	38.08	552.288	-66.4246	-0.222789	0.800284		0.0385786		1.46907
R_CONFS_27	0.142	10.93	594.128	-71.4568	-0.239667	0.78689		0.0379329		0.414607
R_CONFS_816	0.162	-95.45	677.808	-81.5211	-0.273423	0.760771		0.0366738		-3.50052
R_CONFS_128	0.303	-112.72	1267.75	-152.475	-0.511402	0.599654		0.028907		-3.2584
R_CONFS_90	0.311	-65.14	1301.22	-156.5	-0.524905	0.591612		0.0285193		-1.85775
R_CONFS_772	0.322	-103.73	1347.25	-162.036	-0.543471	0.580729		0.0279947		-2.90389
R_CONFS_39	0.324	88.37	1355.62	-163.042	-0.546846	0.578772		0.0279004		2.46556
R_CONFS_728	0.353	-38.43	1476.95	-177.635	-0.595792	0.551126		0.0265676		-1.02099
R_CONFS_11	0.366	63.39	1531.34	-184.177	-0.617734	0.539165		0.0259911		1.64757
R_CONFS_125	0.376	58.58	1573.18	-189.209	-0.634612	0.530141		0.0255561		1.49707
R_CONFS_13	0.376	39.03	1573.18	-189.209	-0.634612	0.530141		0.0255561		0.997453
R_CONFS_2	0.381	-119.19	1594.1	-191.726	-0.643051	0.525686		0.0253413		-3.02043
R_CONFS_122	0.418	-68.06	1748.91	-210.345	-0.705499	0.493862		0.0238072		-1.62032
R_CONFS_55	0.48	23.48	2008.32	-241.544	-0.810143	0.444795		0.0214418		0.503454
R_CONFS_289	0.503	124.06	2104.55	-253.118	-0.848962	0.427859		0.0206254		2.55879
R_CONFS_771	0.505	109.81	2112.92	-254.124	-0.852337	0.426417		0.0205559		2.25725
R_CONFS_129	0.574	89.9	2401.62	-288.846	-0.968795	0.37954		0.0182962		1.64482
R_CONFS_831	0.606	106.58	2535.5	-304.949	-1.0228	0.359585		0.0173342		1.84748
R_CONFS_131	0.62	-4.87	2594.08	-311.994	-1.04643	0.351188		0.0169294		-0.0824462
R_CONFS_51	0.623	10.74	2606.63	-313.504	-1.0515	0.349414		0.0168439		0.180904
R_CONFS_154	0.626	-67.51	2619.18	-315.014	-1.05656	0.347649		0.0167588		-1.13139
R_CONFS_533	0.63	9.21	2635.92	-317.026	-1.06331	0.34531		0.0166461		0.15331
R_CONFS_732	0.651	-6.72	2723.78	-327.594	-1.09876	0.333285		0.0160664		-0.107966
R_CONFS_107	0.655	83.01	2740.52	-329.607	-1.10551	0.331043		0.0159583		1.3247
R_CONFS_71	0.69	-7.88	2886.96	-347.219	-1.16458	0.312054		0.0150429		-0.118538
R_CONFS_54	0.698	41.1	2920.43	-351.245	-1.17808	0.307869		0.0148412		0.609972
R_CONFS_802	0.706	-30.85	2953.9	-355.271	-1.19158	0.30374		0.0146421		-0.451709
R_CONFS_196	0.707	7.44	2958.09	-355.774	-1.19327	0.303227		0.0146174		0.108754
R_CONFS_144	0.743	-38.78	3108.71	-373.89	-1.25403	0.285352		0.0137557		-0.533446
R_CONFS_57	0.813	-18.51	3401.59	-409.115	-1.37218	0.253554		0.0122229		-0.226245
R_CONFS_675	0.82	-103.83	3430.88	-412.638	-1.38399	0.250576		0.0120793		-1.25419
R_CONFS_3	0.844	-41.29	3531.3	-424.715	-1.4245	0.240629		0.0115998		-0.478955
R_CONFS_64	0.917	56.71	3836.73	-461.45	-1.54771	0.212735		0.0102551		0.581568
R_CONFS_767	0.942	-36.36	3941.33	-474.03	-1.5899	0.203945		0.00983141		-0.35747
R_CONFS_76	0.948	38.38	3966.43	-477.049	-1.60003	0.20189		0.00973235		0.373527
R_CONFS_166	0.949	123.86	3970.62	-477.553	-1.60172	0.20155		0.00971593		1.20342
R_CONFS_50	0.952	7.87	3983.17	-479.062	-1.60678	0.200532		0.00966686		0.0760782
R_CONFS_104	1.052	-75.46	4401.57	-529.384	-1.77556	0.169388		0.00816555		-0.616172
R_CONFS_140	1.085	-17.76	4539.64	-545.99	-1.83126	0.160212		0.00772319		-0.137164
R_CONFS_239	1.104	-110.19	4619.14	-555.551	-1.86333	0.155155		0.00747945		-0.82416
R_CONFS_117	1.106	-52.11	4627.5	-556.558	-1.8667	0.154633		0.00745424		-0.388441
R_CONFS_24	1.108	80.62	4635.87	-557.564	-1.87008	0.154111		0.00742912		0.598936
R_CONFS_123	1.147	-168.26	4799.05	-577.19	-1.9359	0.144294		0.00695585		-1.17039
R_CONFS_31	1.147	-29.31	4799.05	-577.19	-1.9359	0.144294		0.00695585		-0.203876
R_CONFS_35	1.166	-10.86	4878.54	-586.751	-1.96797	0.13974		0.00673633		-0.0731565
R_CONFS_66	1.208	-34.16	5054.27	-607.886	-2.03886	0.130177		0.00627534		-0.214366
R_CONFS_730	1.231	-44.08	5150.5	-619.46	-2.07768	0.125221		0.0060364		-0.266085
R_CONFS_85	1.235	20.91	5167.24	-621.473	-2.08443	0.124378		0.00599579		0.125372
R_CONFS_8	1.237	-15.58	5175.61	-622.479	-2.0878	0.123959		0.00597558		-0.0930996
R_CONFS_160	1.288	-157.96	5388.99	-648.143	-2.17388	0.113735		0.00548274		-0.866053
R_CONFS_101	1.294	-182.4	5414.1	-651.162	-2.18401	0.112589		0.00542749		-0.989975
R_CONFS_15	1.299	-27.71	5435.02	-653.678	-2.19245	0.111643		0.00538188		-0.149132
R_CONFS_32	1.322	43.04	5531.25	-665.252	-2.23127	0.107392		0.00517697		0.222817
R_CONFS_165	1.343	-23.24	5619.11	-675.82	-2.26671	0.103652		0.00499669		-0.116123
R_CONFS_754	1.346	21.19	5631.66	-677.33	-2.27177	0.103129		0.00497145		0.105345
R_CONFS_14	1.348	26.17	5640.03	-678.336	-2.27515	0.102781		0.0049547		0.129664
R_CONFS_201	1.352	-26.85	5656.77	-680.349	-2.2819	0.10209		0.00492136		-0.132139
R_CONFS_173	1.405	36.79	5878.52	-707.019	-2.37135	0.0933542		0.00450025		0.165564
R_CONFS_192	1.437	-40.92	6012.41	-723.122	-2.42536	0.0884459		0.00426364		-0.174468
R_CONFS_761	1.496	8.75	6259.26	-752.812	-2.52494	0.0800628		0.00385952		0.0337708
R_CONFS_210	1.504	-88.53	6292.74	-756.838	-2.53845	0.078989		0.00380776		-0.337101
R_CONFS_175	1.526	-71.35	6384.78	-767.909	-2.57558	0.0761098		0.00366896		-0.26178
R_CONFS_228	1.526	-97.09	6384.78	-767.909	-2.57558	0.0761098		0.00366896		-0.356219
R_CONFS_58	1.556	-80.74	6510.3	-783.005	-2.62621	0.072352		0.00348781		-0.281606
R_CONFS_169	1.569	75.12	6564.7	-789.547	-2.64815	0.0707818		0.00341212		0.256318
R_CONFS_187	1.577	-73.94	6598.17	-793.573	-2.66166	0.0698325		0.00336636		-0.248908
R_CONFS_302	1.59	-102.2	6652.56	-800.114	-2.6836	0.068317		0.0032933		-0.336575
R_CONFS_10	1.641	42.53	6865.94	-825.779	-2.76967	0.0626824		0.00302168		0.128512
R_CONFS_327	1.648	-40.04	6895.23	-829.301	-2.78149	0.0619462		0.00298619		-0.119567
R_CONFS_168	1.69	95.42	7070.96	-850.436	-2.85238	0.057707		0.00278183		0.265442
R_CONFS_356	1.696	-102.09	7096.06	-853.455	-2.8625	0.0571256		0.0027538		-0.281136
R_CONFS_217	1.73	-80.74	7238.32	-870.565	-2.91989	0.0539397		0.00260022		-0.209942
R_CONFS_105	1.751	51.11	7326.18	-881.132	-2.95533	0.0520613		0.00250968		0.12827
R_CONFS_791	1.785	-59.68	7468.44	-898.242	-3.01272	0.0491579		0.00236971		-0.141424
R_CONFS_202	1.857	-71.01	7769.69	-934.473	-3.13424	0.0435329		0.00209855		-0.149018
R_CONFS_53	1.895	-64.34	7928.68	-953.596	-3.19838	0.0408285		0.00196818		-0.126633
R_CONFS_216	1.896	-95.28	7932.86	-954.099	-3.20006	0.0407596		0.00196487		-0.187212
R_CONFS_236	1.905	-18.75	7970.52	-958.628	-3.21525	0.0401452		0.00193524		-0.0362858
R_CONFS_163	1.959	-57.95	8196.46	-985.801	-3.30639	0.0366481		0.00176666		-0.102378
R_CONFS_18	2.001	-123.84	8372.18	-1006.94	-3.37728	0.0341401		0.00164576		-0.203811
R_CONFS_100	2.017	29.5	8439.13	-1014.99	-3.40429	0.0332305		0.00160192		0.0472565
R_CONFS_242	2.045	10.83	8556.28	-1029.08	-3.45154	0.0316966		0.00152797		0.0165479
R_CONFS_739	2.056	35.79	8602.3	-1034.61	-3.47011	0.0311136		0.00149987		0.0536802
R_CONFS_260	2.089	-96.34	8740.38	-1051.22	-3.52581	0.029428		0.00141861		-0.136669
R_CONFS_176	2.14	80.48	8953.76	-1076.88	-3.61189	0.0270009		0.00130161		0.104753
R_CONFS_121	2.142	-0.8	8962.13	-1077.89	-3.61526	0.0269099		0.00129722		-0.00103778
R_CONFS_293	2.17	-99.3	9079.28	-1091.98	-3.66252	0.0256678		0.00123734		-0.122868
R_CONFS_38	2.372	-68.61	9924.45	-1193.63	-4.00345	0.0182525		0.000879882		-0.0603687
R_CONFS_136	2.376	-101.19	9941.18	-1195.64	-4.01021	0.0181297		0.000873961		-0.0884362
R_CONFS_203	2.39	-15.23	9999.76	-1202.69	-4.03383	0.0177063		0.000853553		-0.0129996
R_CONFS_323	2.447	-33.18	10238.2	-1231.37	-4.13004	0.0160822		0.000775263		-0.0257232
R_CONFS_159	2.512	-120.83	10510.2	-1264.08	-4.23975	0.0144113		0.000694711		-0.0839419
R_CONFS_827	2.522	7.64	10552	-1269.11	-4.25662	0.0141701		0.000683084		0.00521876
R_CONFS_61	2.555	-95.44	10690.1	-1285.72	-4.31232	0.0134024		0.000646078		-0.0616617
R_CONFS_127	2.568	-31.61	10744.5	-1292.26	-4.33426	0.0131115		0.000632057		-0.0199793
R_CONFS_221	2.618	76.39	10953.7	-1317.42	-4.41865	0.0120505		0.000580906		0.0443754
R_CONFS_330	2.668	-4.59	11162.9	-1342.58	-4.50304	0.0110753		0.000533895		-0.00245058
R_CONFS_70	2.684	142.31	11229.9	-1350.63	-4.53005	0.0107802		0.00051967		0.0739543
R_CONFS_235	2.708	83.91	11330.3	-1362.71	-4.57055	0.0103522		0.000499041		0.0418745
R_CONFS_198	2.727	51.78	11409.8	-1372.27	-4.60262	0.0100255		0.000483291		0.0250248
R_CONFS_111	2.749	-30.41	11501.8	-1383.34	-4.63975	0.00966008		0.000465675		-0.0141612
R_CONFS_212	2.753	120.43	11518.6	-1385.36	-4.64651	0.00959508		0.000462542		0.0557039
R_CONFS_161	2.773	105.53	11602.2	-1395.42	-4.68026	0.00927659		0.000447189		0.0471918
R_CONFS_82	2.784	40.95	11648.3	-1400.96	-4.69883	0.00910595		0.000438963		0.0179755
R_CONFS_146	2.802	-103.6	11723.6	-1410.01	-4.72921	0.00883347		0.000425828		-0.0441157
R_CONFS_135	2.81	19.61	11757	-1414.04	-4.74271	0.008715		0.000420117		0.00823849
R_CONFS_138	2.813	138.84	11769.6	-1415.55	-4.74777	0.00867099		0.000417995		0.0580344
R_CONFS_157	2.82	-105.34	11798.9	-1419.07	-4.75959	0.00856914		0.000413085		-0.0435144
R_CONFS_224	2.831	-19.59	11844.9	-1424.61	-4.77815	0.00841152		0.000405487		-0.00794349
R_CONFS_152	2.849	103.83	11920.2	-1433.66	-4.80853	0.00815982		0.000393353		0.0408419
R_CONFS_178	2.852	120.41	11932.8	-1435.17	-4.8136	0.0081186		0.000391367		0.0471245
R_CONFS_167	2.864	45.59	11983	-1441.21	-4.83385	0.00795583		0.00038352		0.0174847
R_CONFS_434	2.942	53.25	12309.3	-1480.46	-4.9655	0.00697447		0.000336212		0.0179033
R_CONFS_399	2.981	43.55	12472.5	-1500.09	-5.03132	0.00653017		0.000314794		0.0137093
R_CONFS_316	3.062	-60.87	12811.4	-1540.85	-5.16803	0.00569575		0.00027457		-0.0167131
R_CONFS_119	3.116	76.25	13037.3	-1568.02	-5.25918	0.00519959		0.000250652		0.0191122
conf_name	dGrel	SROT						normalized_pop		weighted_SROT
