# Supplementary material for: Enantioselective synthesis of highly oxygenated acyclic quaternary center-containing building blocks via palladium-catalyzed decarboxylative allylic alkylation of cyclic siloxyketones
Source: Chem Sci. 2020 Sep 15;11(40):11068–71. doi: 10.1039/d0sc04383d (PMC8162308; doi:10.1039/d0sc04383d)
Supplement: SC-011-D0SC04383D-s002 [file SC-011-D0SC04383D-s002.xlsx]

## Sheet: using_b3pw91_dunning_dGrel
S_CONFS_59	0	-135.48	0	0	0	1	10.2342	0.0977118	1	-13.238	-34.674
S_CONFS_118	0.26	82.56	1087.84	-130.836	-0.438827	0.644792		0.0630038		5.2016
S_CONFS_323	0.59	-202.95	2468.56	-296.898	-0.9958	0.369428		0.0360975		-7.32598
S_CONFS_108	0.705	-164.69	2949.72	-354.768	-1.1899	0.304253		0.0297291		-4.89608
S_CONFS_77	0.707	52.88	2958.09	-355.774	-1.19327	0.303227		0.0296289		1.56678
S_CONFS_25	0.754	85.08	3154.74	-379.425	-1.2726	0.280103		0.0273693		2.32858
S_CONFS_48	0.772	-162.61	3230.05	-388.483	-1.30298	0.271721		0.0265504		-4.31735
S_CONFS_67	0.799	-196.77	3343.02	-402.07	-1.34855	0.259616		0.0253676		-4.99158
S_CONFS_41	0.813	32.67	3401.59	-409.115	-1.37218	0.253554		0.0247752		0.809406
S_CONFS_95	0.843	118.43	3527.11	-424.212	-1.42281	0.241035		0.023552		2.78926
S_CONFS_171	0.884	-78.44	3698.66	-444.844	-1.49201	0.22492		0.0219773		-1.7239
S_CONFS_126	0.887	138.61	3711.21	-446.353	-1.49708	0.223784		0.0218663		3.03089
S_CONFS_319	0.9	-226.59	3765.6	-452.895	-1.51902	0.218927		0.0213917		-4.84716
S_CONFS_38	0.925	-43.17	3870.2	-465.475	-1.56121	0.209881		0.0205079		-0.885326
S_CONFS_160	0.93	85.88	3891.12	-467.991	-1.56965	0.208118		0.0203356		1.74642
S_CONFS_63	0.973	-221.43	4071.03	-489.63	-1.64223	0.193549		0.018912		-4.18768
S_CONFS_65	1.01	-0.4	4225.84	-508.249	-1.70467	0.181831		0.0177671		-0.00710683
S_CONFS_207	1.085	-11.21	4539.64	-545.99	-1.83126	0.160212		0.0156546		-0.175488
S_CONFS_141	1.093	152.34	4573.11	-550.016	-1.84476	0.158063		0.0154446		2.35283
S_CONFS_92	1.111	23.28	4648.42	-559.074	-1.87514	0.153333		0.0149825		0.348792
S_CONFS_155	1.124	85.45	4702.82	-565.616	-1.89708	0.150005		0.0146573		1.25247
S_CONFS_9	1.126	-94.31	4711.18	-566.622	-1.90046	0.1495		0.0146079		-1.37767
S_CONFS_3	1.128	11.58	4719.55	-567.628	-1.90383	0.148996		0.0145587		0.16859
S_CONFS_79	1.147	-197.57	4799.05	-577.19	-1.9359	0.144294		0.0140992		-2.78558
S_CONFS_21	1.15	159.15	4811.6	-578.699	-1.94097	0.143565		0.014028		2.23256
S_CONFS_179	1.197	-228.63	5008.25	-602.35	-2.02029	0.132617		0.0129582		-2.96264
S_CONFS_37	1.201	17.26	5024.98	-604.363	-2.02704	0.131724		0.012871		0.222154
S_CONFS_279	1.202	-139.96	5029.17	-604.866	-2.02873	0.131502		0.0128493		-1.79839
S_CONFS_29	1.227	12.32	5133.77	-617.447	-2.07093	0.126069		0.0123184		0.151763
S_CONFS_70	1.23	128.41	5146.32	-618.956	-2.07599	0.125432		0.0122562		1.57382
S_CONFS_156	1.251	-156.27	5234.18	-629.524	-2.11143	0.121064		0.0118294		-1.84858
S_CONFS_188	1.284	64.06	5372.26	-646.13	-2.16713	0.114506		0.0111886		0.716739
S_CONFS_219	1.328	-22.96	5556.35	-668.272	-2.24139	0.10631		0.0103878		-0.238503
S_CONFS_28	1.328	-57.1	5556.35	-668.272	-2.24139	0.10631		0.0103878		-0.593141
S_CONFS_206	1.361	27.14	5694.42	-684.878	-2.29709	0.100551		0.00982501		0.266651
S_CONFS_66	1.377	5.37	5761.37	-692.929	-2.3241	0.0978718		0.00956324		0.0513546
S_CONFS_64	1.389	65.48	5811.58	-698.968	-2.34435	0.0959095		0.00937149		0.613645
S_CONFS_97	1.405	-227.4	5878.52	-707.019	-2.37135	0.0933542		0.00912181		-2.0743
S_CONFS_34	1.456	-235.84	6091.9	-732.683	-2.45743	0.0856546		0.00836947		-1.97386
S_CONFS_2	1.457	32.44	6096.09	-733.187	-2.45912	0.0855102		0.00835535		0.271048
S_CONFS_42	1.46	38.53	6108.64	-734.696	-2.46418	0.0850783		0.00831315		0.320306
S_CONFS_31	1.496	40.66	6259.26	-752.812	-2.52494	0.0800628		0.00782308		0.318086
S_CONFS_7	1.515	-100.94	6338.76	-762.373	-2.55701	0.077536		0.00757619		-0.76474
S_CONFS_109	1.543	28.35	6455.91	-776.463	-2.60427	0.0739571		0.00722648		0.204871
S_CONFS_85	1.551	150.67	6489.38	-780.489	-2.61777	0.0729652		0.00712956		1.07421
S_CONFS_157	1.56	42.53	6527.04	-785.018	-2.63296	0.0718652		0.00702208		0.298649
S_CONFS_36	1.584	-146.72	6627.46	-797.095	-2.67347	0.0690123		0.00674332		-0.98938
S_CONFS_208	1.622	-48.01	6786.45	-816.217	-2.73761	0.0647251		0.0063244		-0.303635
S_CONFS_14	1.63	-11.86	6819.92	-820.243	-2.75111	0.063857		0.00623958		-0.0740015
S_CONFS_24	1.64	88.07	6861.76	-825.275	-2.76799	0.0627883		0.00613516		0.540323
S_CONFS_284	1.672	-55.87	6995.65	-841.378	-2.822	0.0594871		0.00581259		-0.324749
S_CONFS_117	1.724	79.89	7213.22	-867.546	-2.90976	0.0544887		0.00532419		0.42535
S_CONFS_106	1.728	-8.96	7229.95	-869.558	-2.91651	0.0541221		0.00528837		-0.0473838
S_CONFS_290	1.768	-104.9	7397.31	-889.687	-2.98403	0.0505888		0.00494312		-0.518534
S_CONFS_119	1.79	-143.1	7489.36	-900.758	-3.02116	0.0487448		0.00476294		-0.681577
S_CONFS_137	1.813	33.92	7585.59	-912.332	-3.05998	0.0468888		0.00458159		0.155408
S_CONFS_310	1.817	56.32	7602.33	-914.345	-3.06673	0.0465733		0.00455077		0.256299
S_CONFS_40	1.837	50.2	7686.01	-924.409	-3.10048	0.0450274		0.00439971		0.220866
S_CONFS_196	1.856	-176.59	7765.5	-933.97	-3.13255	0.0436064		0.00426086		-0.752426
S_CONFS_110	1.862	102.97	7790.61	-936.989	-3.14268	0.043167		0.00421793		0.43432
S_CONFS_153	1.898	73.91	7941.23	-955.105	-3.20344	0.0406223		0.00396928		0.293369
S_CONFS_6	1.981	1.58	8288.5	-996.872	-3.34353	0.0353122		0.00345042		0.00545167
S_CONFS_20	2.046	57.74	8560.46	-1029.58	-3.45323	0.0316432		0.00309191		0.178527
S_CONFS_8	2.048	74.74	8568.83	-1030.59	-3.45661	0.0315365		0.00308149		0.230311
S_CONFS_17	2.068	37.63	8652.51	-1040.65	-3.49036	0.0304898		0.00297921		0.112108
S_CONFS_123	2.071	32.65	8665.06	-1042.16	-3.49543	0.0303358		0.00296416		0.09678
S_CONFS_19	2.126	-52.15	8895.18	-1069.84	-3.58826	0.0276465		0.00270139		-0.140877
S_CONFS_10	2.168	59.99	9070.91	-1090.97	-3.65914	0.0257546		0.00251652		0.150966
S_CONFS_209	2.168	36.16	9070.91	-1090.97	-3.65914	0.0257546		0.00251652		0.0909975
S_CONFS_39	2.208	45.86	9238.27	-1111.1	-3.72666	0.0240732		0.00235224		0.107874
S_CONFS_316	2.247	-151.54	9401.45	-1130.73	-3.79248	0.0225396		0.00220239		-0.33375
S_CONFS_43	2.267	-10.86	9485.13	-1140.79	-3.82624	0.0217915		0.00212929		-0.023124
S_CONFS_152	2.31	91.91	9665.04	-1162.43	-3.89881	0.020266		0.00198023		0.182003
S_CONFS_115	2.332	-49.7	9757.09	-1173.5	-3.93594	0.0195273		0.00190805		-0.0948299
S_CONFS_186	2.334	2.49	9765.46	-1174.51	-3.93932	0.0194615		0.00190162		0.00473503
S_CONFS_191	2.36	-117.47	9874.24	-1187.59	-3.9832	0.0186259		0.00181997		-0.213792
S_CONFS_122	2.366	-20.9	9899.34	-1190.61	-3.99333	0.0184383		0.00180164		-0.0376542
S_CONFS_145	2.369	111.86	9911.9	-1192.12	-3.99839	0.0183451		0.00179254		0.200513
S_CONFS_183	2.374	31.58	9932.82	-1194.64	-4.00683	0.018191		0.00177747		0.0561326
S_CONFS_303	2.376	-140.11	9941.18	-1195.64	-4.01021	0.0181297		0.00177148		-0.248202
S_CONFS_81	2.401	-20.63	10045.8	-1208.22	-4.0524	0.0173806		0.00169829		-0.0350357
S_CONFS_114	2.493	-179.65	10430.7	-1254.52	-4.20768	0.0148809		0.00145404		-0.261218
S_CONFS_112	2.515	-163.8	10522.8	-1265.59	-4.24481	0.0143385		0.00140104		-0.22949
S_CONFS_120	2.527	53.41	10573	-1271.63	-4.26506	0.014051		0.00137295		0.0733291
S_CONFS_234	2.548	9.61	10660.8	-1282.2	-4.30051	0.0135617		0.00132514		0.0127346
S_CONFS_144	2.58	-4.18	10794.7	-1298.3	-4.35452	0.0128487		0.00125547		-0.00524785
S_CONFS_101	2.583	81.07	10807.3	-1299.81	-4.35958	0.0127838		0.00124912		0.101267
S_CONFS_159	2.595	110.94	10857.5	-1305.85	-4.37983	0.0125274		0.00122408		0.135799
S_CONFS_32	2.696	75.62	11280.1	-1356.67	-4.5503	0.010564		0.00103223		0.0780573
S_CONFS_131	2.725	-170.92	11401.4	-1371.27	-4.59925	0.0100594		0.000982923		-0.168001
S_CONFS_124	2.824	-3.05	11815.6	-1421.08	-4.76634	0.00851149		0.000831673		-0.0025366
S_CONFS_264	2.885	-87.06	12070.8	-1451.78	-4.86929	0.00767878		0.000750308		-0.0653218
S_CONFS_113	2.913	-45.13	12188	-1465.87	-4.91655	0.00732434		0.000715674		-0.0322984
S_CONFS_128	2.94	79.96	12301	-1479.46	-4.96212	0.00699805		0.000683793		0.0546761
S_CONFS_189	2.959	-183.56	12380.5	-1489.02	-4.99419	0.0067772		0.000662213		-0.121556
S_CONFS_130	2.967	-17.57	12413.9	-1493.04	-5.00769	0.00668631		0.000653331		-0.011479
S_CONFS_105	2.998	28.9	12543.6	-1508.64	-5.06002	0.00634546		0.000620027		0.0179188
S_CONFS_142	3.001	56.51	12556.2	-1510.15	-5.06508	0.00631341		0.000616895		0.0348607
S_CONFS_250	3.003	2.45	12564.6	-1511.16	-5.06845	0.00629214		0.000614816		0.0015063
S_CONFS_228	3.095	17.44	12949.5	-1557.46	-5.22373	0.00538719		0.000526392		0.00918028
S_CONFS_223	3.097	17.48	12957.8	-1558.46	-5.22711	0.00536903		0.000524618		0.00917032
S_CONFS_133	3.121	9.76	13058.3	-1570.54	-5.26761	0.0051559		0.000503792		0.00491701
S_CONFS_261	3.218	-102.57	13464.1	-1619.35	-5.43133	0.00437727		0.000427711		-0.0438703
S_CONFS_148	3.227	-17.75	13501.8	-1623.88	-5.44652	0.00431128		0.000421263		-0.00747742
S_CONFS_198	3.232	-183.56	13522.7	-1626.4	-5.45496	0.00427505		0.000417723		-0.0766772
S_CONFS_342	3.254	-79.53	13614.7	-1637.47	-5.49209	0.00411922		0.000402497		-0.0320105
S_CONFS_103	3.281	-31.99	13727.7	-1651.05	-5.53766	0.00393572		0.000384566		-0.0123023
S_CONFS_205	3.283	-48.33	13736.1	-1652.06	-5.54104	0.00392246		0.00038327		-0.0185235
S_CONFS_229	3.314	6.03	13865.8	-1667.66	-5.59336	0.0037225		0.000363732		0.00219331
S_CONFS_267	3.332	-191.94	13941.1	-1676.72	-5.62374	0.00361111		0.000352848		-0.0677257
S_CONFS_151	3.434	102.2	14367.9	-1728.05	-5.79589	0.00304001		0.000297045		0.030358
S_CONFS_146	3.581	12.61	14982.9	-1802.02	-6.044	0.00237205		0.000231777		0.00292271
S_CONFS_187	3.652	244.98	15280	-1837.75	-6.16383	0.00210417		0.000205602		0.0503684
S_CONFS_308	3.68	-71.41	15397.1	-1851.84	-6.21109	0.00200704		0.000196112		-0.0140043
S_CONFS_224	3.754	80.18	15706.7	-1889.08	-6.33599	0.00177139		0.000173086		0.013878
S_CONFS_135	3.817	30.39	15970.3	-1920.78	-6.44232	0.00159271		0.000155626		0.00472948
S_CONFS_251	3.839	12.85	16062.4	-1931.85	-6.47945	0.00153465		0.000149954		0.0019269
S_CONFS_193	3.966	85.9	16593.7	-1995.76	-6.6938	0.00123856		0.000121022		0.0103958
S_CONFS_172	3.999	32.53	16731.8	-2012.36	-6.7495	0.00117147		0.000114466		0.00372358
S_CONFS_134	4.158	35.58	17397.1	-2092.37	-7.01786	0.000895741		8.75244e-05		0.00311412
S_CONFS_173	4.192	29.69	17539.3	-2109.48	-7.07524	0.000845785		8.26432e-05		0.00245368
S_CONFS_211	4.275	97.94	17886.6	-2151.25	-7.21533	0.000735226		7.18403e-05		0.00703604
S_CONFS_256	4.303	198.99	18003.8	-2165.34	-7.26259	0.000701289		6.85242e-05		0.0136356
S_CONFS_326	4.305	-13.35	18012.1	-2166.35	-7.26597	0.000698926		6.82933e-05		-0.000911716
S_CONFS_269	4.325	14.28	18095.8	-2176.41	-7.29972	0.000675727		6.60265e-05		0.000942858
S_CONFS_341	4.335	-100.06	18137.6	-2181.44	-7.3166	0.000664417		6.49214e-05		-0.00649604
S_CONFS_127	4.483	-3.13	18756.9	-2255.92	-7.56639	0.000517555		5.05713e-05		-0.000158288
S_CONFS_305	4.485	-58.65	18765.2	-2256.93	-7.56977	0.000515811		5.04009e-05		-0.00295601
S_CONFS_111	4.547	124.3	19024.6	-2288.13	-7.67441	0.000464563		4.53933e-05		0.00564239
S_CONFS_274	4.624	15.23	19346.8	-2326.87	-7.80437	0.000407947		3.98612e-05		0.000607087
S_CONFS_163	4.636	49.98	19397	-2332.91	-7.82463	0.000399768		3.9062e-05		0.00195232
S_CONFS_175	4.69	131.71	19623	-2360.09	-7.91577	0.000364944		3.56593e-05		0.00469669
S_CONFS_161	4.702	33.65	19673.2	-2366.12	-7.93602	0.000357627		3.49443e-05		0.00117588
S_CONFS_354	4.724	-158.21	19765.2	-2377.2	-7.97315	0.000344591		3.36706e-05		-0.00532703
S_CONFS_272	4.813	-66.67	20137.6	-2421.98	-8.12337	0.000296529		2.89744e-05		-0.00193172
S_CONFS_337	4.964	-152.24	20769.4	-2497.97	-8.37822	0.000229818		2.24559e-05		-0.00341869
conf	dGrel	SROT						norm. contrib.		weighted SROT	SROT_sum

## Sheet: using_b3pw91_dunning_Erel
S_CONFS_59	0	-135.48	0	0	0	1	20.8537	0.0479532	1	-6.4967	-42.5377
S_CONFS_323	0.142	-202.95	594.128	-71.4568	-0.239667	0.78689		0.0377339		-7.65809
S_CONFS_79	0.271	-197.57	1133.86	-136.372	-0.457393	0.632932		0.0303511		-5.99647
S_CONFS_108	0.284	-164.69	1188.26	-142.914	-0.479334	0.619195		0.0296924		-4.89004
S_CONFS_63	0.294	-221.43	1230.1	-147.946	-0.496212	0.608832		0.0291955		-6.46475
S_CONFS_25	0.295	85.08	1234.28	-148.449	-0.4979	0.607806		0.0291462		2.47976
S_CONFS_48	0.383	-162.61	1602.47	-192.732	-0.646426	0.523915		0.0251234		-4.08532
S_CONFS_118	0.388	82.56	1623.39	-195.248	-0.654865	0.519512		0.0249123		2.05676
S_CONFS_171	0.393	-78.44	1644.31	-197.764	-0.663304	0.515146		0.0247029		-1.9377
S_CONFS_41	0.494	32.67	2066.9	-248.589	-0.833772	0.434408		0.0208312		0.680557
S_CONFS_126	0.524	138.61	2192.42	-263.686	-0.884406	0.41296		0.0198027		2.74486
S_CONFS_179	0.527	-228.63	2204.97	-265.195	-0.889469	0.410874		0.0197027		-4.50463
S_CONFS_319	0.554	-226.59	2317.94	-278.782	-0.93504	0.39257		0.018825		-4.26556
S_CONFS_38	0.574	-43.17	2401.62	-288.846	-0.968795	0.37954		0.0182002		-0.785701
S_CONFS_3	0.587	11.58	2456.01	-295.388	-0.990737	0.371303		0.0178052		0.206184
S_CONFS_29	0.598	12.32	2502.03	-300.924	-1.0093	0.364473		0.0174777		0.215325
S_CONFS_67	0.601	-196.77	2514.58	-302.433	-1.01437	0.362632		0.0173894		-3.42171
S_CONFS_206	0.602	27.14	2518.77	-302.936	-1.01605	0.362021		0.0173601		0.471152
S_CONFS_21	0.609	159.15	2548.06	-306.459	-1.02787	0.357769		0.0171562		2.7304
S_CONFS_95	0.615	118.43	2573.16	-309.478	-1.038	0.354164		0.0169833		2.01133
S_CONFS_34	0.633	-235.84	2648.47	-318.536	-1.06838	0.343566		0.0164751		-3.88549
S_CONFS_77	0.634	52.88	2652.66	-319.039	-1.07006	0.342987		0.0164473		0.869734
S_CONFS_9	0.644	-94.31	2694.5	-324.072	-1.08694	0.337246		0.0161721		-1.52519
S_CONFS_279	0.65	-139.96	2719.6	-327.091	-1.09707	0.333848		0.0160091		-2.24063
S_CONFS_85	0.662	150.67	2769.81	-333.129	-1.11732	0.327155		0.0156881		2.36373
S_CONFS_70	0.69	128.41	2886.96	-347.219	-1.16458	0.312054		0.014964		1.92152
S_CONFS_92	0.701	23.28	2932.98	-352.755	-1.18315	0.306314		0.0146887		0.341953
S_CONFS_2	0.705	32.44	2949.72	-354.768	-1.1899	0.304253		0.0145899		0.473296
S_CONFS_97	0.709	-227.4	2966.46	-356.781	-1.19665	0.302205		0.0144917		-3.29542
S_CONFS_37	0.724	17.26	3029.22	-364.329	-1.22197	0.294651		0.0141294		0.243874
S_CONFS_284	0.726	-55.87	3037.58	-365.335	-1.22534	0.293658		0.0140818		-0.786752
S_CONFS_65	0.742	-0.4	3104.53	-373.387	-1.25235	0.285834		0.0137066		-0.00548266
S_CONFS_219	0.774	-22.96	3238.42	-389.49	-1.30635	0.270805		0.012986		-0.298158
S_CONFS_207	0.796	-11.21	3330.46	-400.56	-1.34349	0.260934		0.0125126		-0.140267
S_CONFS_42	0.809	38.53	3384.86	-407.102	-1.36543	0.255271		0.0122411		0.471649
S_CONFS_7	0.823	-100.94	3443.43	-414.147	-1.38906	0.24931		0.0119552		-1.20676
S_CONFS_14	0.824	-11.86	3447.62	-414.651	-1.39074	0.24889		0.0119351		-0.14155
S_CONFS_117	0.84	79.89	3514.56	-422.702	-1.41775	0.242259		0.0116171		0.928088
S_CONFS_208	0.843	-48.01	3527.11	-424.212	-1.42281	0.241035		0.0115584		-0.554919
S_CONFS_36	0.917	-146.72	3836.73	-461.45	-1.54771	0.212735		0.0102013		-1.49674
S_CONFS_156	0.934	-156.27	3907.86	-470.004	-1.5764	0.206717		0.00991277		-1.54907
S_CONFS_160	0.938	85.88	3924.59	-472.017	-1.58315	0.205327		0.00984607		0.84558
S_CONFS_155	0.94	85.45	3932.96	-473.024	-1.58653	0.204635		0.00981289		0.838511
S_CONFS_24	0.987	88.07	4129.61	-496.675	-1.66586	0.189029		0.00906454		0.798314
S_CONFS_64	0.997	65.48	4171.45	-501.707	-1.68273	0.185865		0.00891283		0.583612
S_CONFS_66	1.008	5.37	4217.47	-507.242	-1.7013	0.182446		0.00874889		0.0469815
S_CONFS_31	1.025	40.66	4288.6	-515.797	-1.72999	0.177286		0.00850143		0.345668
S_CONFS_141	1.071	152.34	4481.06	-538.945	-1.80763	0.164042		0.00786636		1.19836
S_CONFS_28	1.087	-57.1	4548.01	-546.997	-1.83464	0.159672		0.00765677		-0.437202
S_CONFS_157	1.14	42.53	4769.76	-573.667	-1.92409	0.146009		0.00700159		0.297778
S_CONFS_290	1.151	-104.9	4815.78	-579.202	-1.94265	0.143323		0.0068728		-0.720957
S_CONFS_20	1.195	57.74	4999.88	-601.344	-2.01692	0.133065		0.00638089		0.368433
S_CONFS_109	1.209	28.35	5058.46	-608.389	-2.04055	0.129958		0.00623189		0.176674
S_CONFS_188	1.228	64.06	5137.95	-617.95	-2.07261	0.125856		0.00603521		0.386616
S_CONFS_17	1.288	37.63	5388.99	-648.143	-2.17388	0.113735		0.00545397		0.205233
S_CONFS_6	1.292	1.58	5405.73	-650.156	-2.18063	0.11297		0.00541727		0.00855929
S_CONFS_191	1.339	-117.47	5602.38	-673.807	-2.25996	0.104355		0.00500414		-0.587836
S_CONFS_8	1.346	74.74	5631.66	-677.33	-2.27177	0.103129		0.00494537		0.369617
S_CONFS_106	1.416	-8.96	5924.54	-712.555	-2.38992	0.091637		0.00439429		-0.0393728
S_CONFS_110	1.468	102.97	6142.11	-738.722	-2.47769	0.0839372		0.00402506		0.41446
S_CONFS_153	1.48	73.91	6192.32	-744.761	-2.49794	0.0822543		0.00394436		0.291528
S_CONFS_10	1.497	59.99	6263.45	-753.315	-2.52663	0.0799278		0.00383279		0.229929
S_CONFS_119	1.51	-143.1	6317.84	-759.857	-2.54857	0.0781931		0.00374961		-0.536569
S_CONFS_40	1.564	50.2	6543.78	-787.031	-2.63971	0.0713816		0.00342298		0.171834
S_CONFS_19	1.567	-52.15	6556.33	-788.541	-2.64478	0.0710211		0.00340569		-0.177607
S_CONFS_196	1.575	-176.59	6589.8	-792.566	-2.65828	0.0700686		0.00336002		-0.593345
S_CONFS_112	1.624	-163.8	6794.82	-817.224	-2.74098	0.064507		0.00309332		-0.506685
S_CONFS_81	1.627	-20.63	6807.37	-818.734	-2.74605	0.0641812		0.00307769		-0.0634928
S_CONFS_115	1.633	-49.7	6832.47	-821.753	-2.75617	0.0635345		0.00304668		-0.15142
S_CONFS_101	1.654	81.07	6920.34	-832.32	-2.79162	0.061322		0.00294059		0.238393
S_CONFS_152	1.687	91.91	7058.41	-848.927	-2.84731	0.0579999		0.00278128		0.255628
S_CONFS_209	1.692	36.16	7079.33	-851.443	-2.85575	0.0575125		0.00275791		0.099726
S_CONFS_123	1.707	32.65	7142.09	-858.991	-2.88107	0.0560748		0.00268896		0.0877947
S_CONFS_137	1.78	33.92	7447.52	-895.726	-3.00428	0.0495745		0.00237726		0.0806365
S_CONFS_186	1.787	2.49	7476.81	-899.248	-3.01609	0.0489922		0.00234934		0.00584985
S_CONFS_113	1.806	-45.13	7556.3	-908.809	-3.04816	0.0474461		0.00227519		-0.102679
S_CONFS_310	1.827	56.32	7644.17	-919.377	-3.08361	0.0457939		0.00219596		0.123677
S_CONFS_234	1.828	9.61	7648.35	-919.88	-3.08529	0.0457166		0.00219226		0.0210676
S_CONFS_144	1.842	-4.18	7706.93	-926.925	-3.10892	0.0446491		0.00214107		-0.00894965
S_CONFS_43	1.853	-10.86	7752.95	-932.46	-3.12749	0.0438278		0.00210168		-0.0228243
S_CONFS_131	1.858	-170.92	7773.87	-934.977	-3.13593	0.0434595		0.00208402		-0.356201
S_CONFS_120	1.872	53.41	7832.45	-942.022	-3.15956	0.0424446		0.00203535		0.108708
S_CONFS_39	1.873	45.86	7836.63	-942.525	-3.16124	0.042373		0.00203192		0.0931839
S_CONFS_159	1.902	110.94	7957.97	-957.118	-3.21019	0.040349		0.00193486		0.214654
S_CONFS_189	1.921	-183.56	8037.46	-966.679	-3.24226	0.0390756		0.0018738		-0.343954
S_CONFS_145	1.938	111.86	8108.59	-975.234	-3.27095	0.0379703		0.0018208		0.203675
S_CONFS_183	1.983	31.58	8296.87	-997.879	-3.3469	0.0351932		0.00168763		0.0532953
S_CONFS_122	1.986	-20.9	8309.42	-999.388	-3.35196	0.0350155		0.00167911		-0.0350933
S_CONFS_32	2.013	75.62	8422.39	-1012.98	-3.39754	0.0334556		0.0016043		0.121318
S_CONFS_124	2.019	-3.05	8447.5	-1015.99	-3.40766	0.0331185		0.00158814		-0.00484383
S_CONFS_250	2.034	2.45	8510.26	-1023.54	-3.43298	0.0322906		0.00154844		0.00379367
S_CONFS_114	2.154	-179.65	9012.34	-1083.93	-3.63551	0.0263704		0.00126454		-0.227175
S_CONFS_264	2.187	-87.06	9150.41	-1100.53	-3.69121	0.0249418		0.00119604		-0.104127
S_CONFS_105	2.197	28.9	9192.25	-1105.57	-3.70809	0.0245243		0.00117602		0.033987
S_CONFS_198	2.208	-183.56	9238.27	-1111.1	-3.72666	0.0240732		0.00115439		-0.211899
S_CONFS_151	2.216	102.2	9271.74	-1115.13	-3.74016	0.0237503		0.00113891		0.116396
S_CONFS_148	2.241	-17.75	9376.34	-1127.71	-3.78235	0.0227691		0.00109185		-0.0193803
S_CONFS_130	2.258	-17.57	9447.47	-1136.26	-3.81105	0.022125		0.00106097		-0.0186412
S_CONFS_303	2.288	-140.11	9572.99	-1151.36	-3.86168	0.0210326		0.00100858		-0.141313
S_CONFS_223	2.3	17.48	9623.2	-1157.4	-3.88193	0.0206109		0.000988361		0.0172765
S_CONFS_228	2.3	17.44	9623.2	-1157.4	-3.88193	0.0206109		0.000988361		0.017237
S_CONFS_103	2.313	-31.99	9677.59	-1163.94	-3.90387	0.0201636		0.000966911		-0.0309315
S_CONFS_205	2.329	-48.33	9744.54	-1171.99	-3.93088	0.0196264		0.000941149		-0.0454857
S_CONFS_316	2.335	-151.54	9769.64	-1175.01	-3.94101	0.0194287		0.000931667		-0.141185
S_CONFS_229	2.345	6.03	9811.48	-1180.04	-3.95788	0.0191035		0.000916074		0.00552393
S_CONFS_267	2.379	-191.94	9953.74	-1197.15	-4.01527	0.0180381		0.000864985		-0.166025
S_CONFS_133	2.409	9.76	10079.3	-1212.25	-4.0659	0.0171475		0.000822278		0.00802543
S_CONFS_128	2.453	79.96	10263.4	-1234.39	-4.14017	0.0159202		0.000763425		0.0610435
S_CONFS_261	2.599	-102.57	10874.2	-1307.86	-4.38658	0.0124432		0.000596689		-0.0612024
S_CONFS_142	2.686	56.51	11238.2	-1351.64	-4.53342	0.0107438		0.000515202		0.029114
S_CONFS_134	2.768	35.58	11581.3	-1392.9	-4.67182	0.00935521		0.000448612		0.0159616
S_CONFS_146	2.783	12.61	11644.1	-1400.45	-4.69714	0.00912134		0.000437397		0.00551558
S_CONFS_224	2.82	80.18	11798.9	-1419.07	-4.75959	0.00856914		0.000410918		0.0329474
S_CONFS_251	3.027	12.85	12665	-1523.24	-5.10896	0.00604236		0.00028975		0.00372329
S_CONFS_135	3.067	30.39	12832.3	-1543.37	-5.17647	0.00564789		0.000270834		0.00823066
S_CONFS_173	3.108	29.69	13003.9	-1564	-5.24567	0.00527027		0.000252727		0.00750345
S_CONFS_187	3.189	244.98	13342.8	-1604.76	-5.38238	0.00459685		0.000220434		0.0540018
S_CONFS_111	3.193	124.3	13359.5	-1606.77	-5.38914	0.00456592		0.00021895		0.0272155
S_CONFS_211	3.199	97.94	13384.6	-1609.79	-5.39926	0.00451991		0.000216744		0.0212279
S_CONFS_193	3.21	85.9	13430.6	-1615.33	-5.41783	0.00443677		0.000212757		0.0182759
S_CONFS_342	3.242	-79.53	13564.5	-1631.43	-5.47184	0.0042035		0.000201571		-0.016031
S_CONFS_172	3.256	32.53	13623.1	-1638.47	-5.49547	0.00410534		0.000196864		0.00640399
S_CONFS_341	3.304	-100.06	13823.9	-1662.63	-5.57648	0.00378586		0.000181544		-0.0181653
S_CONFS_127	3.326	-3.13	13916	-1673.7	-5.61361	0.00364787		0.000174927		-0.000547521
S_CONFS_175	3.333	131.71	13945.3	-1677.22	-5.62543	0.00360502		0.000172872		0.022769
S_CONFS_274	3.37	15.23	14100.1	-1695.84	-5.68788	0.00338678		0.000162407		0.00247346
S_CONFS_269	3.458	14.28	14468.3	-1740.12	-5.8364	0.00291933		0.000139991		0.00199907
S_CONFS_305	3.502	-58.65	14652.4	-1762.26	-5.91066	0.00271038		0.000129972		-0.00762283
S_CONFS_354	3.524	-158.21	14744.4	-1773.34	-5.9478	0.00261159		0.000125234		-0.0198133
S_CONFS_163	3.56	49.98	14895	-1791.45	-6.00856	0.00245763		0.000117851		0.00589021
S_CONFS_161	3.591	33.65	15024.7	-1807.05	-6.06088	0.00233235		0.000111844		0.00376354
S_CONFS_326	3.63	-13.35	15187.9	-1826.68	-6.1267	0.00218377		0.000104719		-0.001398
S_CONFS_308	3.725	-71.41	15585.4	-1874.48	-6.28704	0.00186025		8.9205e-05		-0.00637013
S_CONFS_272	3.788	-66.67	15849	-1906.18	-6.39337	0.0016726		8.02066e-05		-0.00534738
S_CONFS_337	3.814	-152.24	15957.8	-1919.27	-6.43726	0.00160079		7.6763e-05		-0.0116864
S_CONFS_256	3.91	198.99	16359.4	-1967.58	-6.59929	0.00136134		6.52806e-05		0.0129902
conf	dErel	SROT						norm. contrib.		weighted SROT	SROT_sum

## Sheet: using_b3lyp_pople_Erel
S_CONFS_59	0	-135.48	0	0	0	1	22.4675	0.0445086	1	-6.03003	-39.1672
S_CONFS_323	0.177	-202.95	740.568	-89.0693	-0.29874	0.741752		0.0330144		-6.70027
S_CONFS_79	0.188	-197.57	786.592	-94.6047	-0.317306	0.728108		0.0324071		-6.40267
S_CONFS_63	0.26	-221.43	1087.84	-130.836	-0.438827	0.644792		0.0286988		-6.35478
S_CONFS_171	0.292	-78.44	1221.73	-146.939	-0.492837	0.610891		0.0271899		-2.13278
S_CONFS_108	0.31	-164.69	1297.04	-155.997	-0.523217	0.592611		0.0263763		-4.34391
S_CONFS_25	0.346	85.08	1447.66	-174.113	-0.583978	0.557676		0.0248214		2.1118
S_CONFS_118	0.365	82.56	1527.16	-183.674	-0.616046	0.540076		0.024038		1.98458
S_CONFS_48	0.404	-162.61	1690.34	-203.3	-0.68187	0.505671		0.0225067		-3.65982
S_CONFS_38	0.436	-43.17	1824.22	-219.402	-0.735879	0.479084		0.0213234		-0.92053
S_CONFS_179	0.479	-228.63	2004.14	-241.041	-0.808455	0.445546		0.0198306		-4.53388
S_CONFS_21	0.481	159.15	2012.5	-242.047	-0.81183	0.444045		0.0197638		3.14541
S_CONFS_2	0.495	32.44	2071.08	-249.092	-0.835459	0.433675		0.0193023		0.626166
S_CONFS_126	0.511	138.61	2138.02	-257.144	-0.862464	0.422121		0.018788		2.60421
S_CONFS_3	0.536	11.58	2242.62	-269.724	-0.904659	0.40468		0.0180117		0.208576
S_CONFS_41	0.567	32.67	2372.33	-285.324	-0.956981	0.384051		0.0170936		0.558447
S_CONFS_9	0.568	-94.31	2376.51	-285.827	-0.958669	0.383403		0.0170647		-1.60938
S_CONFS_85	0.579	150.67	2422.54	-291.362	-0.977234	0.37635		0.0167508		2.52385
S_CONFS_37	0.586	17.26	2451.82	-294.885	-0.989049	0.37193		0.0165541		0.285724
S_CONFS_92	0.59	23.28	2468.56	-296.898	-0.9958	0.369428		0.0164427		0.382787
S_CONFS_95	0.596	118.43	2493.66	-299.917	-1.00593	0.365705		0.0162771		1.92769
S_CONFS_7	0.605	-100.94	2531.32	-304.446	-1.02112	0.360192		0.0160317		-1.61824
S_CONFS_29	0.609	12.32	2548.06	-306.459	-1.02787	0.357769		0.0159238		0.196181
S_CONFS_279	0.616	-139.96	2577.34	-309.981	-1.03968	0.353567		0.0157368		-2.20252
S_CONFS_319	0.616	-226.59	2577.34	-309.981	-1.03968	0.353567		0.0157368		-3.5658
S_CONFS_70	0.618	128.41	2585.71	-310.988	-1.04306	0.352375		0.0156837		2.01395
S_CONFS_65	0.625	-0.4	2615	-314.51	-1.05487	0.348237		0.0154995		-0.00619982
S_CONFS_34	0.625	-235.84	2615	-314.51	-1.05487	0.348237		0.0154995		-3.65541
S_CONFS_42	0.635	38.53	2656.84	-319.543	-1.07175	0.342408		0.0152401		0.587202
S_CONFS_67	0.656	-196.77	2744.7	-330.11	-1.10719	0.330485		0.0147094		-2.89437
S_CONFS_206	0.662	27.14	2769.81	-333.129	-1.11732	0.327155		0.0145612		0.395192
S_CONFS_77	0.688	52.88	2878.59	-346.213	-1.1612	0.313109		0.0139361		0.736938
S_CONFS_284	0.698	-55.87	2920.43	-351.245	-1.17808	0.307869		0.0137028		-0.765576
S_CONFS_14	0.724	-11.86	3029.22	-364.329	-1.22197	0.294651		0.0131145		-0.155538
S_CONFS_97	0.734	-227.4	3071.06	-369.361	-1.23884	0.289719		0.012895		-2.93233
S_CONFS_117	0.793	79.89	3317.91	-399.051	-1.33842	0.262259		0.0116728		0.932539
S_CONFS_219	0.863	-22.96	3610.79	-434.276	-1.45657	0.233034		0.010372		-0.238142
S_CONFS_208	0.869	-48.01	3635.9	-437.295	-1.4667	0.230687		0.0102675		-0.492945
S_CONFS_207	0.885	-11.21	3702.84	-445.347	-1.4937	0.22454		0.00999398		-0.112033
S_CONFS_36	0.908	-146.72	3799.07	-456.921	-1.53252	0.215991		0.00961346		-1.41049
S_CONFS_64	0.928	65.48	3882.75	-466.985	-1.56628	0.208821		0.00929436		0.608595
S_CONFS_28	0.929	-57.1	3886.94	-467.488	-1.56796	0.208469		0.00927869		-0.529813
S_CONFS_31	0.939	40.66	3928.78	-472.52	-1.58484	0.20498		0.0091234		0.370957
S_CONFS_156	0.968	-156.27	4050.11	-487.114	-1.63379	0.195189		0.00868759		-1.35761
S_CONFS_24	0.973	88.07	4071.03	-489.63	-1.64223	0.193549		0.00861459		0.758687
S_CONFS_155	0.975	85.45	4079.4	-490.636	-1.6456	0.192896		0.00858556		0.733636
S_CONFS_160	0.984	85.88	4117.06	-495.165	-1.66079	0.189988		0.00845613		0.726212
S_CONFS_20	1.042	57.74	4359.73	-524.352	-1.75868	0.172271		0.00766756		0.442725
S_CONFS_141	1.056	152.34	4418.3	-531.397	-1.78231	0.168248		0.00748851		1.1408
S_CONFS_290	1.077	-104.9	4506.17	-541.964	-1.81776	0.16239		0.00722774		-0.75819
S_CONFS_66	1.082	5.37	4527.09	-544.48	-1.8262	0.161025		0.007167		0.0384868
S_CONFS_109	1.083	28.35	4531.27	-544.984	-1.82788	0.160753		0.00715491		0.202842
S_CONFS_6	1.098	1.58	4594.03	-552.532	-1.8532	0.156735		0.00697605		0.0110222
S_CONFS_188	1.156	64.06	4836.7	-581.718	-1.95109	0.142119		0.00632551		0.405212
S_CONFS_17	1.161	37.63	4857.62	-584.235	-1.95953	0.140924		0.00627235		0.236029
S_CONFS_157	1.161	42.53	4857.62	-584.235	-1.95953	0.140924		0.00627235		0.266763
S_CONFS_8	1.162	74.74	4861.81	-584.738	-1.96122	0.140687		0.00626177		0.468005
S_CONFS_191	1.215	-117.47	5083.56	-611.408	-2.05067	0.128648		0.00572596		-0.672628
S_CONFS_10	1.311	59.99	5485.22	-659.717	-2.2127	0.109405		0.00486945		0.292118
S_CONFS_153	1.381	73.91	5778.1	-694.942	-2.33085	0.0972133		0.00432683		0.319796
S_CONFS_106	1.381	-8.96	5778.1	-694.942	-2.33085	0.0972133		0.00432683		-0.0387684
S_CONFS_19	1.39	-52.15	5815.76	-699.471	-2.34604	0.0957478		0.0042616		-0.222243
S_CONFS_110	1.425	102.97	5962.2	-717.084	-2.40511	0.0902555		0.00401715		0.413646
S_CONFS_115	1.429	-49.7	5978.94	-719.097	-2.41186	0.0896482		0.00399012		-0.198309
S_CONFS_196	1.444	-176.59	6041.7	-726.645	-2.43718	0.0874071		0.00389037		-0.687001
S_CONFS_119	1.447	-143.1	6054.25	-728.155	-2.44224	0.0869656		0.00387072		-0.5539
S_CONFS_40	1.481	50.2	6196.5	-745.264	-2.49963	0.0821156		0.00365485		0.183474
S_CONFS_81	1.522	-20.63	6368.05	-765.896	-2.56883	0.0766254		0.00341049		-0.0703584
S_CONFS_152	1.535	91.91	6422.44	-772.438	-2.59077	0.0749624		0.00333648		0.306655
S_CONFS_112	1.539	-163.8	6439.18	-774.45	-2.59752	0.074458		0.00331403		-0.542838
S_CONFS_113	1.562	-45.13	6535.41	-786.024	-2.63634	0.071623		0.00318784		-0.143867
S_CONFS_101	1.573	81.07	6581.43	-791.56	-2.6549	0.0703055		0.0031292		0.253685
S_CONFS_144	1.66	-4.18	6945.44	-835.34	-2.80174	0.0607042		0.00270186		-0.0112938
S_CONFS_209	1.666	36.16	6970.54	-838.359	-2.81187	0.0600925		0.00267464		0.0967149
S_CONFS_123	1.692	32.65	7079.33	-851.443	-2.85575	0.0575125		0.0025598		0.0835776
S_CONFS_137	1.695	33.92	7091.88	-852.952	-2.86082	0.0572221		0.00254688		0.08639
S_CONFS_159	1.712	110.94	7163.01	-861.507	-2.88951	0.0556035		0.00247484		0.274559
S_CONFS_186	1.717	2.49	7183.93	-864.023	-2.89795	0.0551363		0.00245404		0.00611056
S_CONFS_39	1.732	45.86	7246.69	-871.571	-2.92326	0.0537579		0.00239269		0.109729
S_CONFS_310	1.735	56.32	7259.24	-873.081	-2.92833	0.0534864		0.00238061		0.134076
S_CONFS_124	1.749	-3.05	7317.82	-880.126	-2.95196	0.0522374		0.00232502		-0.0070913
S_CONFS_43	1.749	-10.86	7317.82	-880.126	-2.95196	0.0522374		0.00232502		-0.0252497
S_CONFS_145	1.753	111.86	7334.55	-882.139	-2.95871	0.0518859		0.00230937		0.258326
S_CONFS_131	1.757	-170.92	7351.29	-884.152	-2.96546	0.0515368		0.00229383		-0.392062
S_CONFS_234	1.77	9.61	7405.68	-890.693	-2.9874	0.0504183		0.00224405		0.0215653
S_CONFS_120	1.778	53.41	7439.15	-894.719	-3.0009	0.0497421		0.00221395		0.118247
S_CONFS_32	1.806	75.62	7556.3	-908.809	-3.04816	0.0474461		0.00211176		0.159691
S_CONFS_189	1.827	-183.56	7644.17	-919.377	-3.08361	0.0457939		0.00203822		-0.374136
S_CONFS_183	1.935	31.58	8096.04	-973.724	-3.26589	0.0381631		0.00169859		0.0536414
S_CONFS_122	1.955	-20.9	8179.72	-983.789	-3.29964	0.0368963		0.00164221		-0.0343221
S_CONFS_250	1.955	2.45	8179.72	-983.789	-3.29964	0.0368963		0.00164221		0.0040234
S_CONFS_130	2.018	-17.57	8443.31	-1015.49	-3.40597	0.0331745		0.00147655		-0.025943
S_CONFS_148	2.027	-17.75	8480.97	-1020.02	-3.42116	0.0326744		0.00145429		-0.0258137
S_CONFS_151	2.087	102.2	8732.01	-1050.21	-3.52243	0.0295275		0.00131423		0.134314
S_CONFS_103	2.092	-31.99	8752.93	-1052.73	-3.53087	0.0292794		0.00130319		-0.0416889
S_CONFS_114	2.102	-179.65	8794.77	-1057.76	-3.54775	0.0287894		0.00128138		-0.230199
S_CONFS_105	2.14	28.9	8953.76	-1076.88	-3.61189	0.0270009		0.00120177		0.0347312
S_CONFS_198	2.158	-183.56	9029.07	-1085.94	-3.64227	0.0261929		0.00116581		-0.213996
S_CONFS_228	2.169	17.44	9075.1	-1091.48	-3.66083	0.0257111		0.00114437		0.0199578
S_CONFS_223	2.17	17.48	9079.28	-1091.98	-3.66252	0.0256678		0.00114244		0.0199698
S_CONFS_133	2.187	9.76	9150.41	-1100.53	-3.69121	0.0249418		0.00111012		0.0108348
S_CONFS_264	2.199	-87.06	9200.62	-1106.57	-3.71147	0.0244417		0.00108787		-0.0947096
S_CONFS_205	2.238	-48.33	9363.79	-1126.2	-3.77729	0.0228846		0.00101856		-0.0492272
S_CONFS_128	2.305	79.96	9644.12	-1159.91	-3.89037	0.0204377		0.000909656		0.0727361
S_CONFS_229	2.325	6.03	9727.8	-1169.98	-3.92413	0.0197594		0.000879462		0.00530316
S_CONFS_303	2.354	-140.11	9849.14	-1184.57	-3.97307	0.0188155		0.000837453		-0.117335
S_CONFS_267	2.371	-191.94	9920.26	-1193.13	-4.00177	0.0182833		0.000813765		-0.156194
S_CONFS_316	2.393	-151.54	10012.3	-1204.2	-4.0389	0.0176169		0.000784103		-0.118823
S_CONFS_142	2.513	56.51	10514.4	-1264.58	-4.24143	0.0143869		0.000640344		0.0361858
S_CONFS_146	2.52	12.61	10543.7	-1268.11	-4.25325	0.014218		0.000632823		0.00797989
S_CONFS_134	2.532	35.58	10593.9	-1274.14	-4.2735	0.0139329		0.000620135		0.0220644
S_CONFS_261	2.585	-102.57	10815.6	-1300.82	-4.36296	0.0127407		0.00056707		-0.0581644
S_CONFS_224	2.612	80.18	10928.6	-1314.4	-4.40853	0.0121731		0.000541809		0.0434422
S_CONFS_251	2.81	12.85	11757	-1414.04	-4.74271	0.008715		0.000387893		0.00498442
S_CONFS_135	2.922	30.39	12225.6	-1470.4	-4.93174	0.00721392		0.000321082		0.00975768
S_CONFS_187	2.999	244.98	12547.8	-1509.15	-5.0617	0.00633476		0.000281952		0.0690725
S_CONFS_172	3	32.53	12552	-1509.65	-5.06339	0.00632408		0.000281476		0.00915642
S_CONFS_342	3.181	-79.53	13309.3	-1600.73	-5.36888	0.00465934		0.000207381		-0.016493
S_CONFS_173	3.213	29.69	13443.2	-1616.84	-5.42289	0.00441436		0.000196477		0.00583341
S_CONFS_341	3.227	-100.06	13501.8	-1623.88	-5.44652	0.00431128		0.000191889		-0.0192004
S_CONFS_111	3.251	124.3	13602.2	-1635.96	-5.48703	0.00414013		0.000184272		0.022905
S_CONFS_269	3.272	14.28	13690	-1646.52	-5.52247	0.00399596		0.000177855		0.00253977
S_CONFS_211	3.325	97.94	13911.8	-1673.2	-5.61192	0.00365403		0.000162636		0.0159286
S_CONFS_274	3.357	15.23	14045.7	-1689.3	-5.66593	0.00346191		0.000154085		0.00234671
S_CONFS_193	3.361	85.9	14062.4	-1691.31	-5.67269	0.00343862		0.000153048		0.0131468
S_CONFS_127	3.373	-3.13	14112.6	-1697.35	-5.69294	0.00336967		0.00014998		-0.000469436
S_CONFS_354	3.409	-158.21	14263.3	-1715.47	-5.7537	0.00317103		0.000141138		-0.0223295
S_CONFS_175	3.41	131.71	14267.4	-1715.97	-5.75539	0.00316568		0.0001409		0.018558
S_CONFS_161	3.426	33.65	14334.4	-1724.02	-5.78239	0.00308133		0.000137146		0.00461496
S_CONFS_305	3.533	-58.65	14782.1	-1777.86	-5.96299	0.00257222		0.000114486		-0.0067146
S_CONFS_308	3.553	-71.41	14865.8	-1787.93	-5.99674	0.00248684		0.000110686		-0.00790408
S_CONFS_326	3.637	-13.35	15217.2	-1830.2	-6.13852	0.00215812		9.6055e-05		-0.00128233
S_CONFS_163	3.682	49.98	15405.5	-1852.84	-6.21447	0.00200028		8.90297e-05		0.00444971
S_CONFS_272	3.724	-66.67	15581.2	-1873.98	-6.28536	0.00186339		8.29371e-05		-0.00552942
S_CONFS_256	3.739	198.99	15644	-1881.53	-6.31067	0.00181681		8.08638e-05		0.0160911
S_CONFS_337	3.754	-152.24	15706.7	-1889.08	-6.33599	0.00177139		7.88422e-05		-0.0120029
conf	dErel	SROT						norm. contrib.		weighted SROT	SROT_sum
